# Supplementary material
Source: PubMed Central journal article supplement (PMC4528116)
Supplement: supp_M115.655852_jbc.M115.655852-1.pdf [file supp_M115.655852_jbc.M115.655852-1.pdf]

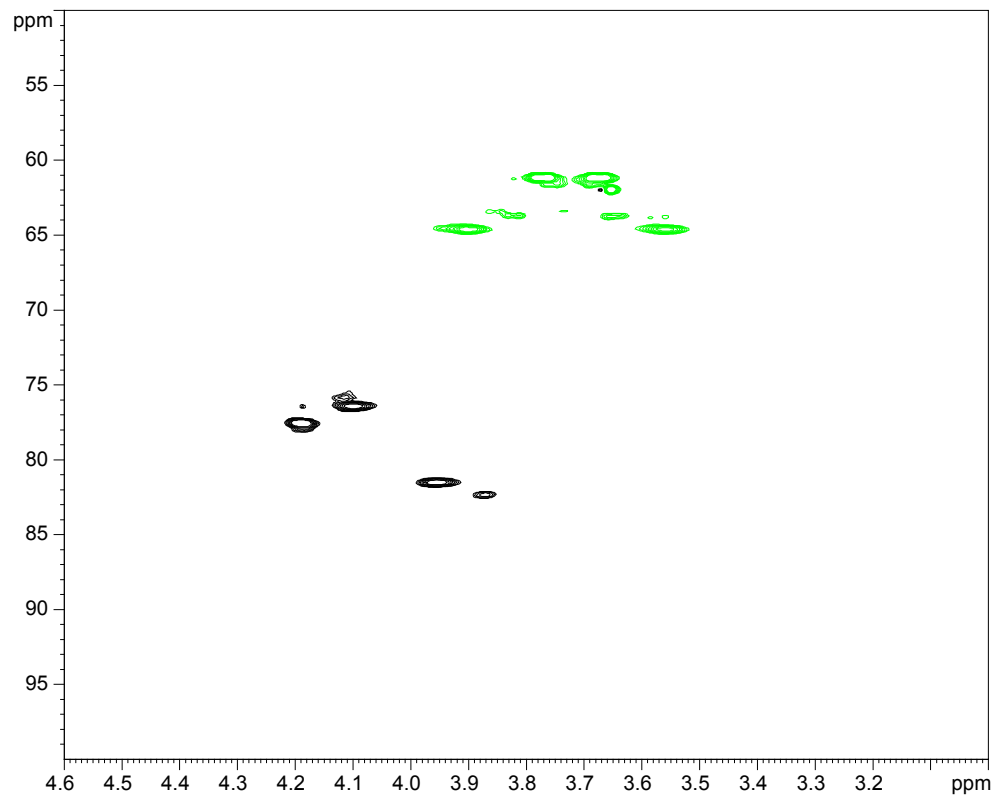

SUPPLEMENTAL FIGURE S1. <sup>1</sup>H-<sup>13</sup>C HSQC spectrum of the Pf1 (Levan) polysaccharide.

*Discovery of novel E. faecium polysaccharide antigens*

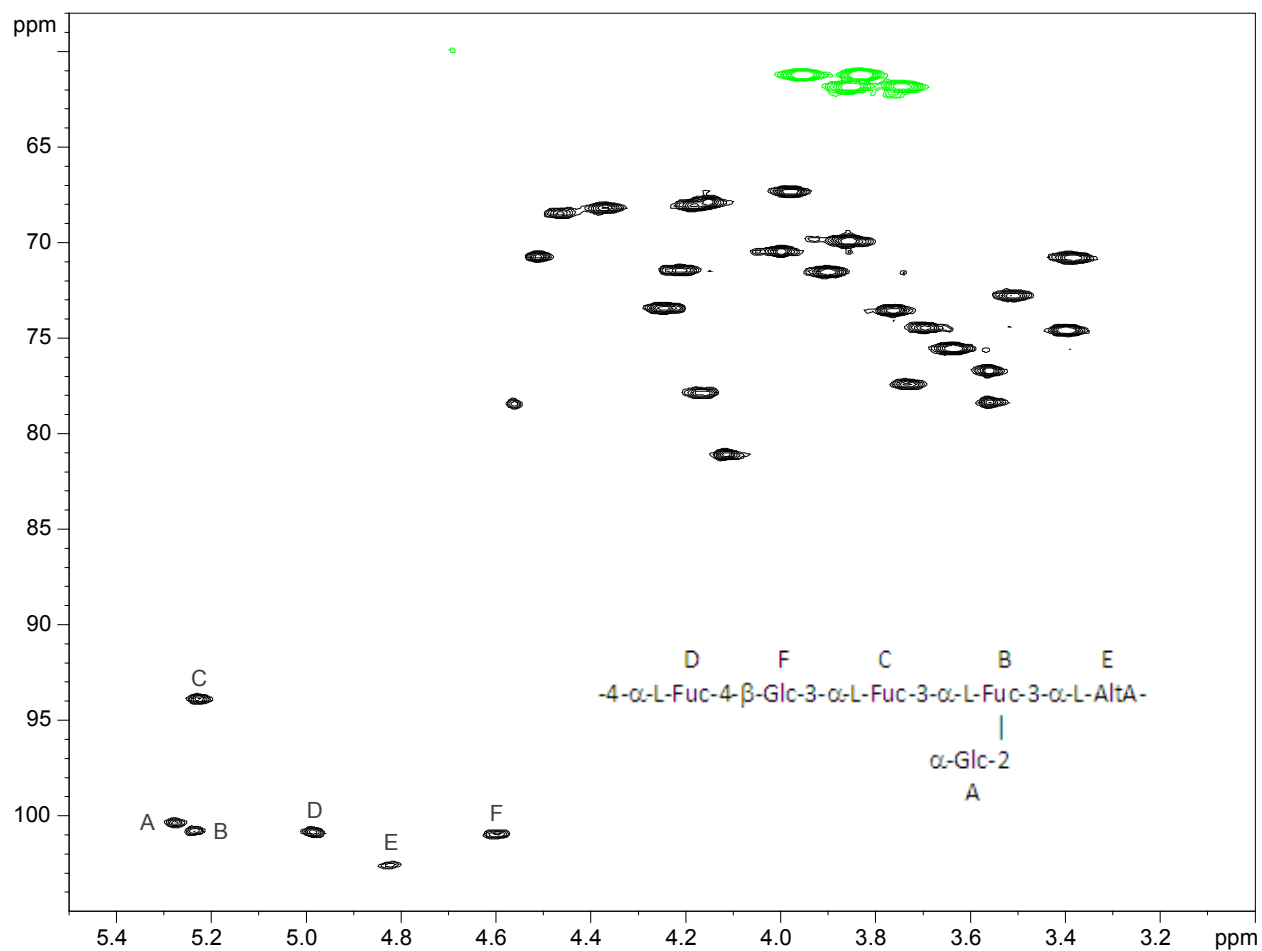

**SUPPLEMENTAL FIGURE S2. Fragment of the  $^1\text{H}$ - $^{13}\text{C}$  HSQC spectrum of the Pf2 polysaccharide.**

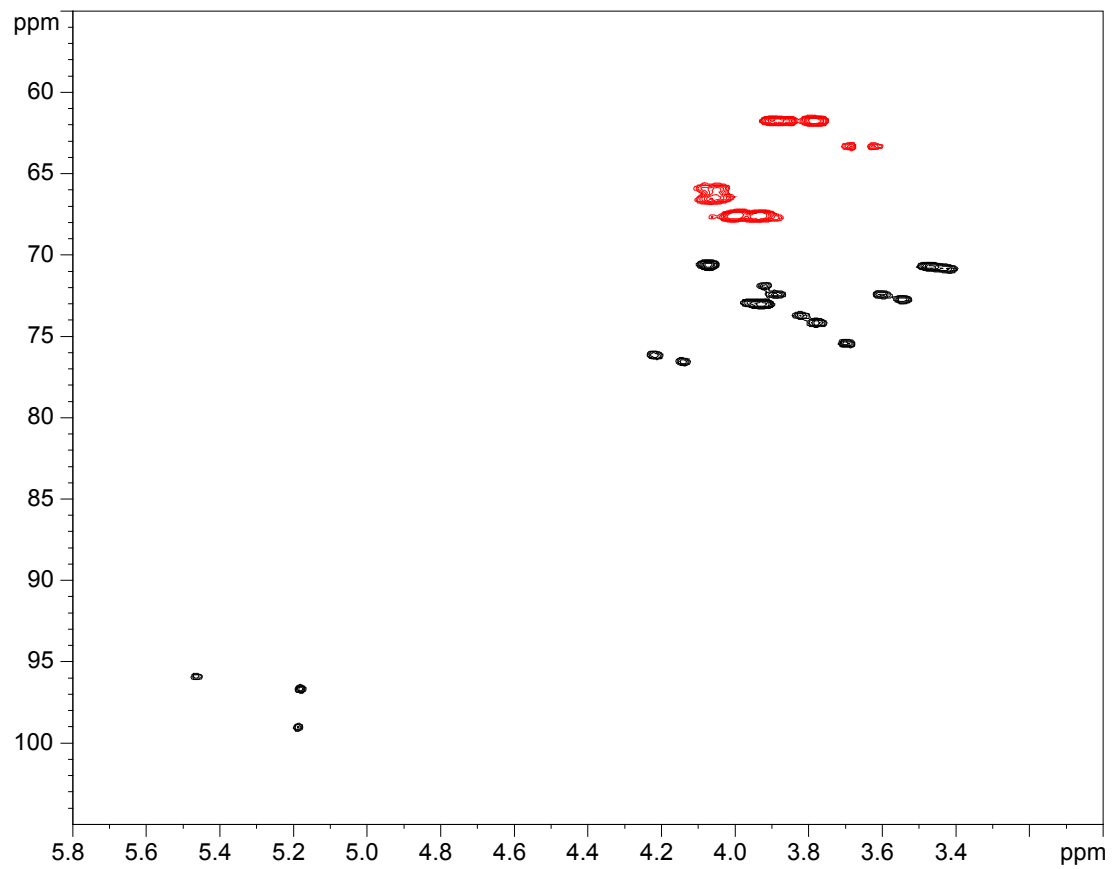

SUPPLEMENTAL FIGURE S3.  $^1\text{H}$ - $^{13}\text{C}$  HSQC spectrum of PF3 (LTA).





SUPPLEMENTAL TABLE S2. **Annotation of the 17 genes associated with the putative *E. faecium* Tx16 legionaminic biosynthesis gene cluster.** Orthologues of Tx16 open reading frames (ORFs) were identified using TBLASTN queries of representative complete *C. jejuni*, *S. agalactiae* and *S. aureus* genomes (accessible via the NCBI Microbial nucleotide database).

| <i>E. faecium</i> Tx16 gene <sup>1</sup><br>[gene ID]                                | Tx16 gene homologues (E values)                                                                                   |                                                                          |                                                                            |
|--------------------------------------------------------------------------------------|-------------------------------------------------------------------------------------------------------------------|--------------------------------------------------------------------------|----------------------------------------------------------------------------|
|                                                                                      | <i>Campylobacter jejuni</i> <sup>2</sup><br>[locus tag]                                                           | <i>Streptococcus agalactiae</i> <sup>3</sup><br>[gene ID]                | <i>Staphylococcus aureus</i> <sup>4</sup><br>[gene ID]                     |
| <i>epaR</i> , Undecaprenyl-phosphate galactose-phosphotransferase [HMPREF0351_10907] | Undecaprenyl-phosphate diacetylBac PhosphoTransferase (10 <sup>-38</sup> ) <sup>†</sup> [Cj1124c]                 | Galactosyl transferase CpsE (10 <sup>-31</sup> ) <sup>†</sup> [1013978]  | CPS biosynthesis protein Cap8M (10 <sup>-42</sup> ) <sup>†</sup> [3919835] |
| Family 2 glycosyl transferase [HMPREF0351_10908]                                     | glucosyltransferase (10 <sup>-10</sup> ) <sup>†</sup> [Cj1146c]                                                   | Glycosyl transferase CpsO(V) (10 <sup>-14</sup> ) <sup>*</sup> [1013971] | Glycosyltransferase family 2 (10 <sup>-13</sup> ) <sup>†</sup> [446898095] |
| Group 1 glycosyl transferase [HMPREF0351_10909]                                      | N'-diacetylBac-diphospho-undecaprenol-acetyl galactosaminyltransferase (10 <sup>-6</sup> ) <sup>†</sup> [Cj1125c] | Glycoside hydrolase (10 <sup>-7</sup> ) <sup>*</sup> [1013514]           | Glycosyltransferase family 1 [446615158] (10 <sup>-10</sup> ) <sup>*</sup> |
| Family 14 glycosyl transferase [HMPREF0351_10910]                                    | ND                                                                                                                | ND                                                                       | ND                                                                         |
| Polysaccharide polymerase [HMPREF0351_10911]                                         | ND                                                                                                                | ND                                                                       | ND                                                                         |
| Hypothetical protein [HMPREF0351_10912]                                              | ND                                                                                                                | ND                                                                       | ND                                                                         |
| Hypothetical protein [HMPREF0351_10913]                                              | ND                                                                                                                | ND                                                                       | ND                                                                         |
| <i>cpsL</i> , CPS synthesis protein [HMPREF0351_10914]                               | ND                                                                                                                | <i>cpsL</i> (10 <sup>-14</sup> ) <sup>†</sup> [1013969]                  | ND                                                                         |
| <i>capD</i> , UDP-N-acetylglucosamine 4,6-dehydratase [HMPREF0351_10915]             | UDP-N-acetylglucosamine 4,6-dehydratase (10 <sup>-76</sup> ) [Cj1293]                                             | dTDP-glucose 4,6-dehydratase (10 <sup>-9</sup> ) <sup>*</sup> [1014005]  | CPS biosynthesis protein Cap5D (10 <sup>-61</sup> ) <sup>*</sup> [3919826] |
| N-acetylneuraminatase synthase ( <i>legI</i> ) [HMPREF0351_10916]                    | <i>legI</i> <sup>5</sup> (10 <sup>-98</sup> ) <sup>*</sup> [Cj1327]                                               | <i>neuB</i> (10 <sup>-87</sup> ) <sup>*</sup> [1013968]                  | ND                                                                         |

SUPPLEMENTAL TABLE S2 (Continued)

| <i>E. faecium</i> Tx16 gene<br>(Continued) <sup>1</sup><br>[gene ID]   | Tx16 gene homologues (E values)                         |                                                                 |                                                                     |
|------------------------------------------------------------------------|---------------------------------------------------------|-----------------------------------------------------------------|---------------------------------------------------------------------|
|                                                                        | <i>Campylobacter jejuni</i> <sup>2</sup><br>[locus tag] | <i>Streptococcus agalactiae</i> <sup>3</sup><br>[gene ID]       | <i>Staphylococcus aureus</i> <sup>4</sup><br>[gene ID]              |
| UDP-N-acetylglucosamine 2-epimerase (legG)<br>[HMPREF0351_10917]       | legG <sup>5</sup> (10 <sup>-56</sup> )* [Cj1328]        | neuC (10 <sup>-47</sup> )* [1013967]                            | UDP-N-acetylglucosamine 2-epimerase (10 <sup>-12</sup> )* [3919838] |
| IpsB, hexapeptide transferase<br>[HMPREF0351_10918]                    | Unknown (10 <sup>-18</sup> ) [Cj1328]                   | neuD (10 <sup>-14</sup> )* [1013966]                            | Acetyl transferase (10 <sup>-5</sup> ) <sup>†</sup><br>[447147537]  |
| Glutamine-scylo-inositol<br>transaminase (legC)<br>[HMPREF0351_10919]  | legC <sup>5</sup> (10 <sup>-96</sup> )* [Cj1320]        | ND                                                              | ND                                                                  |
| Dehydrogenase<br>[HMPREF0351_10920]                                    | ND                                                      | ND                                                              | Unknown (10 <sup>-5</sup> ) <sup>†</sup> [3919494]                  |
| Dehydrogenase (PtmF)<br>[HMPREF0351_10921]                             | PtmF <sup>5</sup> (10 <sup>-37</sup> )* [Cj1330]        | ND                                                              | ND                                                                  |
| N-acylneuraminate<br>Cytidylyltransferase (LegF)<br>[HMPREF0351_10922] | legF <sup>5</sup> (10 <sup>-33</sup> )* [Cj1331]        | neuA (10 <sup>-13</sup> )* [1013965]                            | ND                                                                  |
| UDP-glucose-4-epimerase<br>[HMPREF0351_10923]                          | Epimerase/dehydratase (10 <sup>-41</sup> )<br>[Cj1319]  | galE UDP-glucose 4-epimerase<br>(10 <sup>-23</sup> )* [1014733] | NAD-dependent dehydratase<br>(10 <sup>-81</sup> )* [3919466]        |

<sup>1</sup>Reference 22, Genbank NC\_017960; <sup>2</sup>strain NCTC11168, Genbank NC\_002163; <sup>3</sup>strain 2603V/R, Genbank NC\_004116; <sup>4</sup>strains NCTC8325 or N315, Genbank NC\_007795 or NC\_002745.

<sup>5</sup>Annotation based on biochemical activities described in reference 36.

“ND” – not detected (E value < 0.001)

\*E value reflects Tx16 ORF query coverage of >75% with BLAST orthologue.

<sup>†</sup>E value reflects Tx16 ORF query coverage of <75% with BLAST orthologue (partial or discontinuous).
